# Supplementary material for: Comparison of Cellular and Transcriptional Responses to 1,25-Dihydroxyvitamin D3 and Glucocorticoids in Peripheral Blood Mononuclear Cells
Source: PubMed Central journal article supplement (PMC3792986; doi:10.1371/journal.pone.0076643), 2013-10-08

Enterprise core

Edge

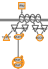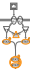

Edge

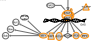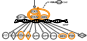

Supplement: pone.0076643.s003.pdf [file pone.0076643.s003.pdf]
