# Supplementary material for: Comparison of Cellular and Transcriptional Responses to 1,25-Dihydroxyvitamin D3 and Glucocorticoids in Peripheral Blood Mononuclear Cells
Source: PLoS One. 2013 Oct 8;8(10):e76643. doi: 10.1371/journal.pone.0076643 (PMC3792986; doi:10.1371/journal.pone.0076643)
Supplement: Table S4 — (A) Genes in GO category "immune response" noted to be down-regulated in both dexamethasone and vitamin D treatment at 24 hours, (B) Genes in GO category "defense response" noted to be down-regulated in both dexamethasone and vitamin D treatment at 24 hours. (XLSX) [file pone.0076643.s007.xlsx]

## Sheet: gene list immune response overl
Table S4a: Genes in GO category "immune response" noted to be down-regulated in both dexamethasone and vitamin D treatment at 24 hours
Entrez ID	Official gene symbol	Gene Name
54	acp5	acid phosphatase 5, tartrate resistant
55122	akirin2	akirin 2
60489	APOBEC3G	apolipoprotein B mRNA editing enzyme, catalytic polypeptide-like 3G
602	Bcl3	B-cell CLL/lymphoma 3
6357	CCL13	chemokine (C-C motif) ligand 13
6363	CCL19	chemokine (C-C motif) ligand 19
6368	CCL23	chemokine (C-C motif) ligand 23
6369	CCL24	chemokine (C-C motif) ligand 24
6352	CCL5	chemokine (C-C motif) ligand 5
1235	Ccnl2	cyclin L2; chemokine (C-C motif) receptor 6
1235	CCR6	cyclin L2; chemokine (C-C motif) receptor 6
910	CD1B	CD1b molecule
911	CD1C	CD1c molecule
80381	CD276	CD276 molecule
972	CD74	CD74 molecule, major histocompatibility complex, class II invariant chain
629	CFB	complement factor B
50856	CLEC4A	C-type lectin domain family 4, member A
338339	CLEC4D	C-type lectin domain family 4, member D
26253	Clec4e	C-type lectin domain family 4, member E
93978	CLEC6A	C-type lectin domain family 6, member A
8530	Cst7	cystatin F (leukocystatin)
2919	CXCL1	chemokine (C-X-C motif) ligand 1 (melanoma growth stimulating activity, alpha)
3627	CXCL10	chemokine (C-X-C motif) ligand 10
4283	Cxcl9	chemokine (C-X-C motif) ligand 9
1594	CYP27B1	cytochrome P450, family 27, subfamily B, polypeptide 1
23586	DDX58	DEAD (Asp-Glu-Ala-Asp) box polypeptide 58
79132	dhx58	DEXH (Asp-Glu-X-His) box polypeptide 58
2633	GBP1	guanylate binding protein 1, interferon-inducible, 67kDa
2634	GBP2	guanylate binding protein 2, interferon-inducible
115361	GBP4	guanylate binding protein 4
115362	gbp5	guanylate binding protein 5
57817	Hamp	hepcidin antimicrobial peptide
3113	hla-dpa1	major histocompatibility complex, class II, DP alpha 1
3115	HLA-DPB1	major histocompatibility complex, class II, DP beta 1
3125	HLA-DRB3	major histocompatibility complex, class II, DR beta 3
3383	ICAM1	intercellular adhesion molecule 1
23308	ICOSLG	inducible T-cell co-stimulator ligand
3430	IFI35	interferon-induced protein 35
10964	IFI44L	interferon-induced protein 44-like
64135	IFIH1	interferon induced with helicase C domain 1
3458	IFNG	interferon, gamma
3512	Igj	immunoglobulin J polypeptide, linker protein for immunoglobulin alpha and mu polypeptides
10261	Igsf6	immunoglobulin superfamily, member 6
3600	IL15	interleukin 15
10068	IL18BP	interleukin 18 binding protein
29949	IL19	interleukin 19
3552	Il1a	interleukin 1, alpha
3557	IL1RN	interleukin 1 receptor antagonist
3561	il2rg	interleukin 2 receptor, gamma (severe combined immunodeficiency)
3569	IL6	interleukin 6 (interferon, beta 2)
3576	IL8	interleukin 8
8942	Kynu	kynureninase (L-kynurenine hydrolase)
3936	LCP1	lymphocyte cytosolic protein 1 (L-plastin)
11026	LILRA3	leukocyte immunoglobulin-like receptor, subfamily A (without TM domain), member 3
353514	Lilra5	leukocyte immunoglobulin-like receptor, subfamily A (with TM domain), member 5
203068	LOC442308	tubulin, beta; similar to tubulin, beta 5; tubulin, beta pseudogene 2; tubulin, beta pseudogene 1
4049	lta	lymphotoxin alpha (TNF superfamily, member 1)
4067	LYN	v-yes-1 Yamaguchi sarcoma viral related oncogene homolog
10892	MALT1	mucosa associated lymphoid tissue lymphoma translocation gene 1
4277	micB	MHC class I polypeptide-related sequence B
4683	NBN	nibrin
4688	Ncf2	neutrophil cytosolic factor 2
4791	NFKB2	nuclear factor of kappa light polypeptide gene enhancer in B-cells 2 (p49/p100)
4940	Oas3	2'-5'-oligoadenylate synthetase 3, 100kDa
9934	P2RY14	purinergic receptor P2Y, G-protein coupled, 14
5133	Pdcd1	programmed cell death 1
5052	PRDX1	peroxiredoxin 1
5699	PSMB10	proteasome (prosome, macropain) subunit, beta type, 10
5724	PTAFR	platelet-activating factor receptor
5763	PTMS	parathymosin
5971	relB	v-rel reticuloendotheliosis viral oncogene homolog B
91543	RSAD2	radical S-adenosyl methionine domain containing 2
22904	SBNO2	strawberry notch homolog 2 (Drosophila)
57823	SLAMF7	SLAM family member 7
6890	tap1	transporter 1, ATP-binding cassette, sub-family B (MDR/TAP)
6891	TAP2	transporter 2, ATP-binding cassette, sub-family B (MDR/TAP)
6892	Tapbp	TAP binding protein (tapasin)
8743	TNFSF10	tumor necrosis factor (ligand) superfamily, member 10
10673	TNFSF13B	tumor necrosis factor (ligand) superfamily, member 13b
8740	Tnfsf14	tumor necrosis factor (ligand) superfamily, member 14
203068	tubB	tubulin, beta; similar to tubulin, beta 5; tubulin, beta pseudogene 2; tubulin, beta pseudogene 1
203068	TUBBP1	tubulin, beta; similar to tubulin, beta 5; tubulin, beta pseudogene 2; tubulin, beta pseudogene 1
203068	TUBBP2	tubulin, beta; similar to tubulin, beta 5; tubulin, beta pseudogene 2; tubulin, beta pseudogene 1
Table S4b: Genes in GO category "defense response" noted to be down-regulated in both dexamethasone and vitamin D treatment at 24 hours
Entrez ID	Official gene symbol	Gene Name
55122	akirin2	akirin 2
27063	ANKRD1	ankyrin repeat domain 1 (cardiac muscle)
60489	APOBEC3G	apolipoprotein B mRNA editing enzyme, catalytic polypeptide-like 3G
602	Bcl3	B-cell CLL/lymphoma 3
6357	CCL13	chemokine (C-C motif) ligand 13
6363	CCL19	chemokine (C-C motif) ligand 19
6368	CCL23	chemokine (C-C motif) ligand 23
6369	CCL24	chemokine (C-C motif) ligand 24
6352	CCL5	chemokine (C-C motif) ligand 5
1235	Ccnl2	cyclin L2; chemokine (C-C motif) receptor 6
1235	CCR6	cyclin L2; chemokine (C-C motif) receptor 6
972	CD74	CD74 molecule, major histocompatibility complex, class II invariant chain
629	CFB	complement factor B
2919	CXCL1	chemokine (C-X-C motif) ligand 1 (melanoma growth stimulating activity, alpha)
3627	CXCL10	chemokine (C-X-C motif) ligand 10
4283	Cxcl9	chemokine (C-X-C motif) ligand 9
1594	CYP27B1	cytochrome P450, family 27, subfamily B, polypeptide 1
23586	DDX58	DEAD (Asp-Glu-Ala-Asp) box polypeptide 58
79132	dhx58	DEXH (Asp-Glu-X-His) box polypeptide 58
2358	Fpr2	formyl peptide receptor 2
8111	GPR68	G protein-coupled receptor 68
57817	Hamp	hepcidin antimicrobial peptide
23308	ICOSLG	inducible T-cell co-stimulator ligand
3620	IDO1	indoleamine 2,3-dioxygenase 1
64135	IFIH1	interferon induced with helicase C domain 1
3458	IFNG	interferon, gamma
3600	IL15	interleukin 15
3552	Il1a	interleukin 1, alpha
3557	IL1RN	interleukin 1 receptor antagonist
3569	IL6	interleukin 6 (interferon, beta 2)
3576	IL8	interleukin 8
3656	IRAK2	interleukin-1 receptor-associated kinase 2
3665	IRF7	interferon regulatory factor 7
3783	KCNN4	potassium intermediate/small conductance calcium-activated channel, subfamily N, member 4
8942	Kynu	kynureninase (L-kynurenine hydrolase)
3959	LGALS3BP	lectin, galactoside-binding, soluble, 3 binding protein
11026	LILRA3	leukocyte immunoglobulin-like receptor, subfamily A (without TM domain), member 3
3988	lipA	lipase A, lysosomal acid, cholesterol esterase
203068	LOC442308	tubulin, beta; similar to tubulin, beta 5; tubulin, beta pseudogene 2; tubulin, beta pseudogene 1
4046	Lsp1	lymphocyte-specific protein 1
4067	LYN	v-yes-1 Yamaguchi sarcoma viral related oncogene homolog
10892	MALT1	mucosa associated lymphoid tissue lymphoma translocation gene 1
4688	Ncf2	neutrophil cytosolic factor 2
5027	P2RX7	purinergic receptor P2X, ligand-gated ion channel, 7
5052	PRDX1	peroxiredoxin 1
5724	PTAFR	platelet-activating factor receptor
91543	RSAD2	radical S-adenosyl methionine domain containing 2
55829	Sels	selenoprotein S
57823	SLAMF7	SLAM family member 7
6890	tap1	transporter 1, ATP-binding cassette, sub-family B (MDR/TAP)
6891	TAP2	transporter 2, ATP-binding cassette, sub-family B (MDR/TAP)
6892	Tapbp	TAP binding protein (tapasin)
203068	tubB	tubulin, beta; similar to tubulin, beta 5; tubulin, beta pseudogene 2; tubulin, beta pseudogene 1
203068	TUBBP1	tubulin, beta; similar to tubulin, beta 5; tubulin, beta pseudogene 2; tubulin, beta pseudogene 1
203068	TUBBP2	tubulin, beta; similar to tubulin, beta 5; tubulin, beta pseudogene 2; tubulin, beta pseudogene 1
